# Supplementary material
Source: PubMed Central journal article supplement (PMC3844955)
Supplement: emboj2013234df2a.pdf [file emboj2013234df2a.pdf]

For Figure 2A

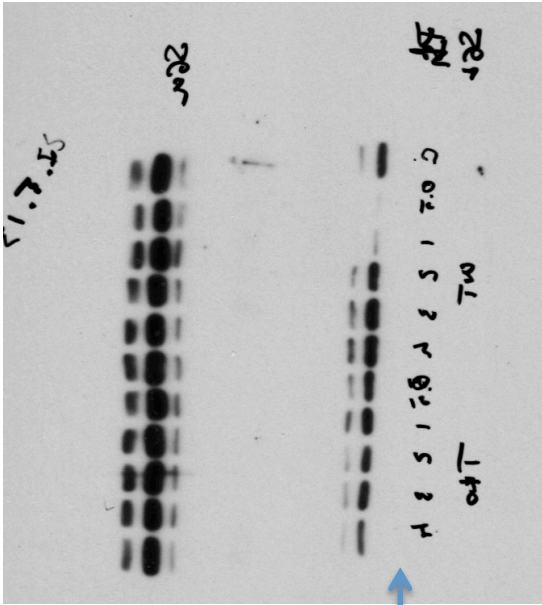

Exposure used for Phospho S6K1

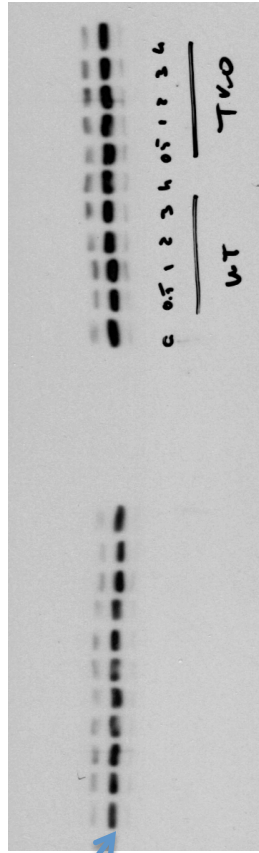

Exposure used for S6K1 (same blot more exposed and legended above)

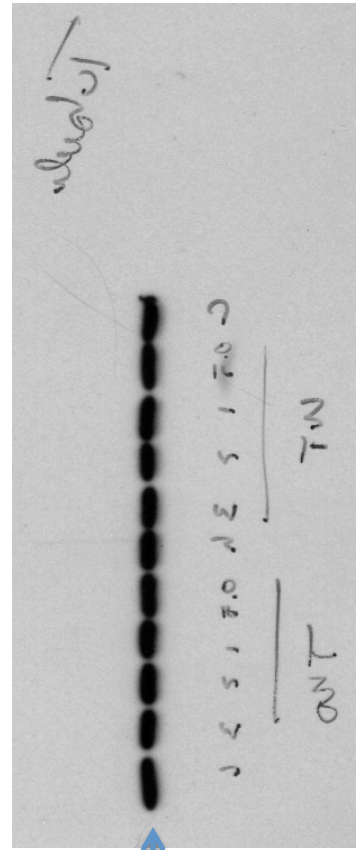

Exposure used for Tubulin
