# Supplementary material
Source: PubMed Central journal article supplement (PMC3844955)

# For Figure 1

Figure 1D

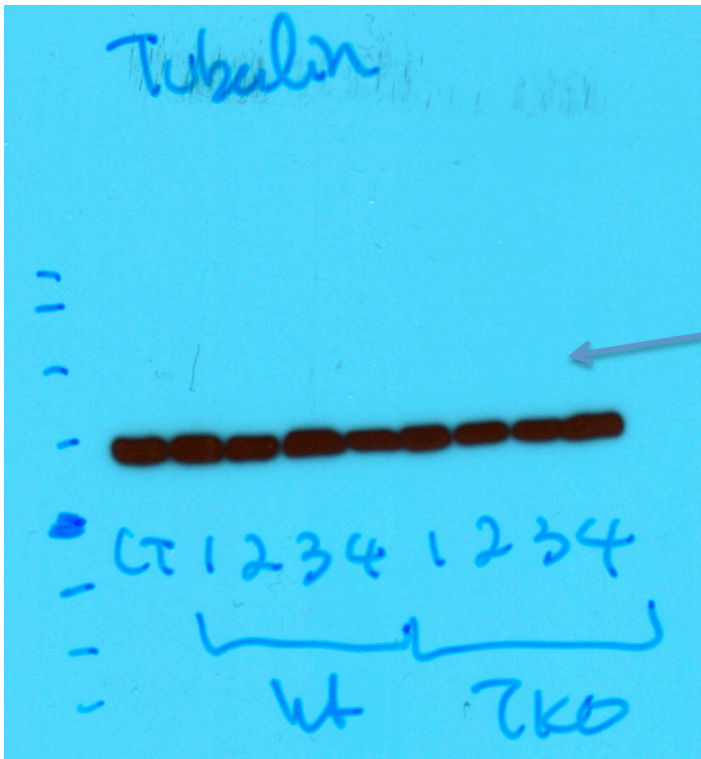

Only « WT » part used for Figure 1D

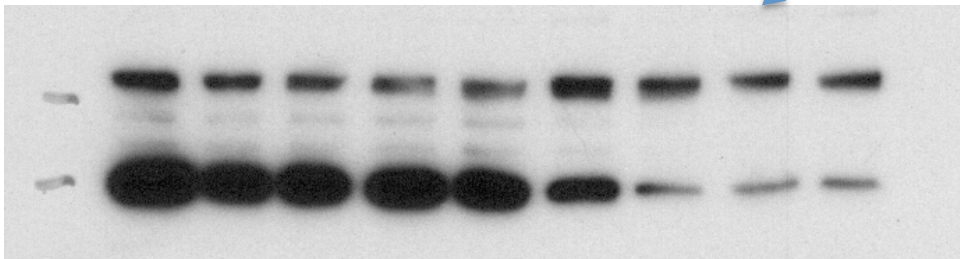

Only « WT » part used for Figure 1D

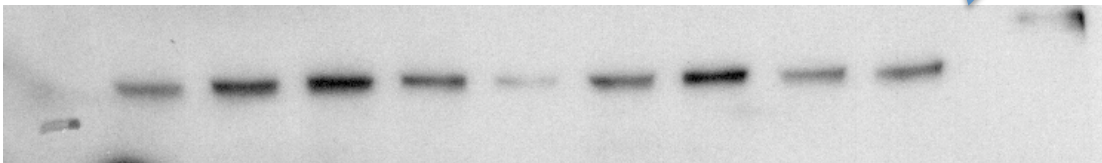

Supplement: emboj2013234df1.pdf [file emboj2013234df1.pdf]

For Figure 3B

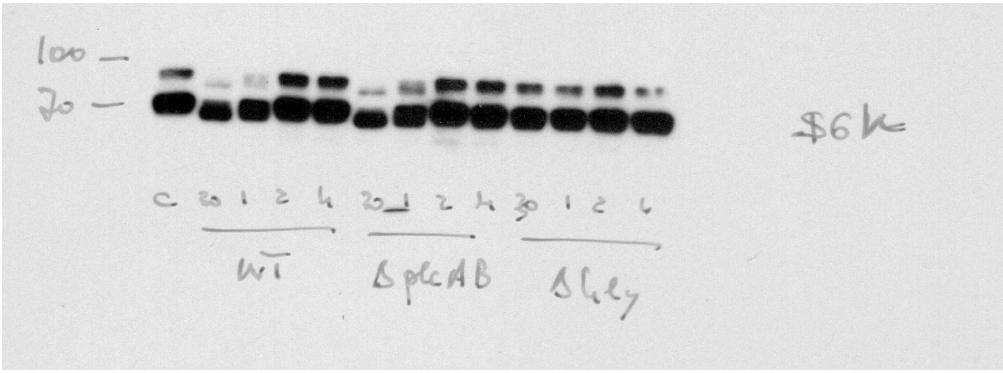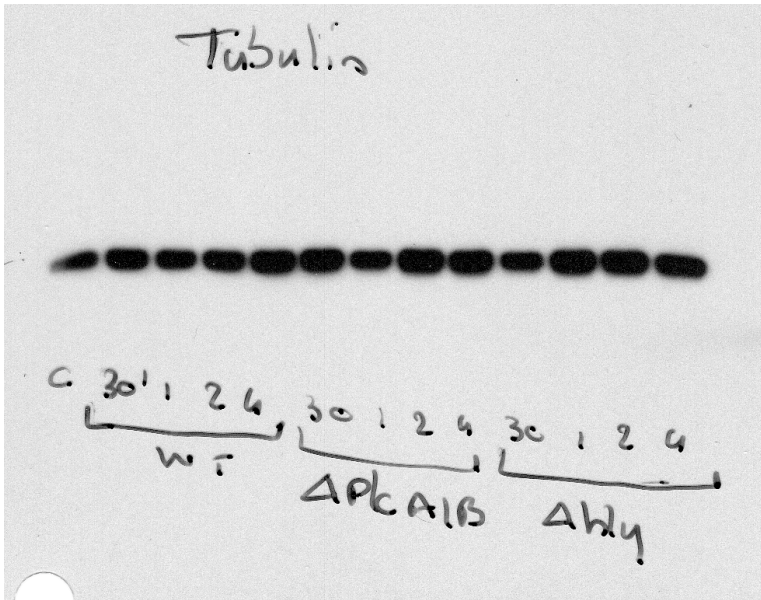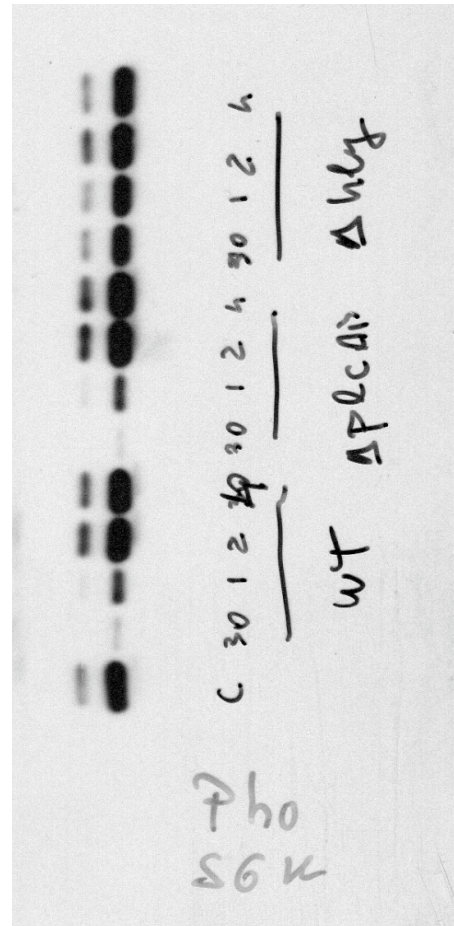

Supplement: emboj2013234df3b.pdf [file emboj2013234df3b.pdf]

For Figure S3D

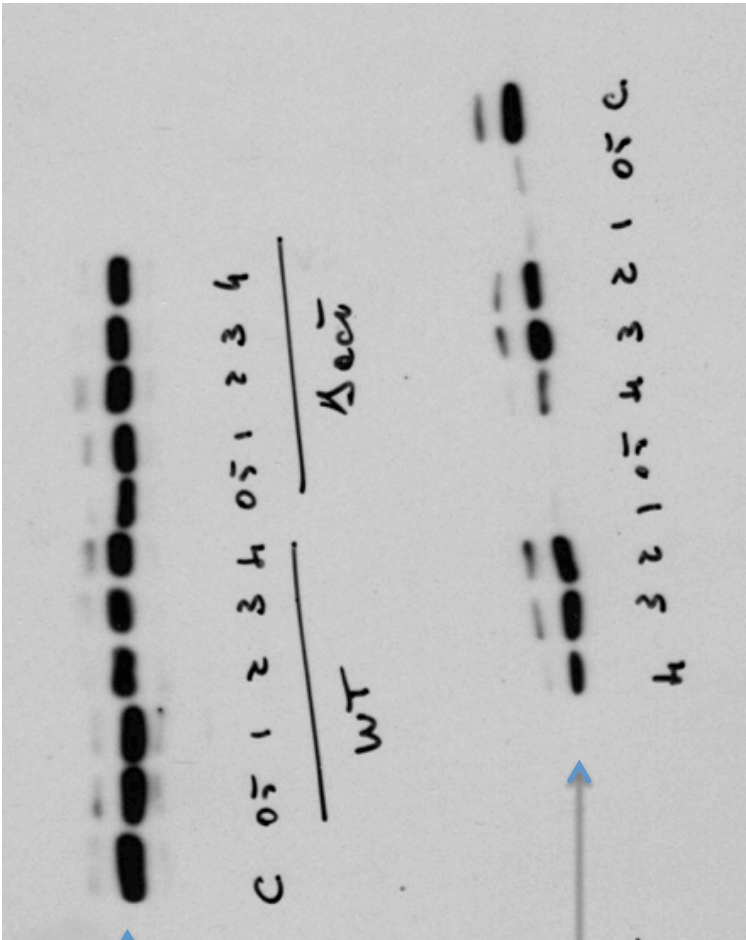

Exposure used for S6K1

Exposure used for Phospho S6K1

Supplement: emboj2013234dfs3d.pdf [file emboj2013234dfs3d.pdf]
